# Supplementary material for: Enhanced solvent resistance and electrical performance of electrohydrodynamic jet printed PEDOT:PSS composite patterns: effects of hardeners on the performance of organic thin-film transistors
Source: Royal Society of Chemistry journal article supplement (doi:10.1039/c9cp04864b), 2019-01-01
Supplement: c9cp04864b1.pdf [file c9cp04864b1.pdf]

Electronic Supplementary Information (ESI) for

**Enhanced solvent resistance and electrical performance of  
electrohydrodynamic jet printed PEDOT:PSS composite patterns:  
Effects of hardeners on the performance of organic thin-film  
transistors**

*Xiaowu Tang,<sup>a,1</sup> Hyeok-jin Kwon,<sup>b,1</sup> Heqing Ye,<sup>a</sup> Jae Young Kim,<sup>c</sup> Jaewoong Lee,<sup>\*,d</sup> Yong Jin Jeong,<sup>\*,3</sup> Se Hyun Kim<sup>\*,1</sup>*

<sup>a</sup>Department of Advanced Materials Engineering, Yeungnam University, Gyeongsan 38541, Republic of Korea

<sup>b</sup>Department of Chemical Engineering, Pohang University of Science and Technology, Pohang 37673, Republic of Korea

<sup>c</sup>Department of Materials Science & Engineering, Korea National University of Transportation, Chungju 27469, Republic of Korea

<sup>d</sup>Department of Textile Engineering and Technology, Yeungnam University, Gyeongsan 38541, Republic of Korea

<sup>1</sup>X. Tang and H. Kwon are equally contributed in this work

**Corresponding Authors**

\*E-mails: [jaewlee@yu.ac.kr](mailto:jaewlee@yu.ac.kr) (J. Lee) [yjjeong@ut.ac.kr](mailto:yjjeong@ut.ac.kr) (Y. J. Jeong), [shkim97@yu.ac.kr](mailto:shkim97@yu.ac.kr) (S. H. Kim)

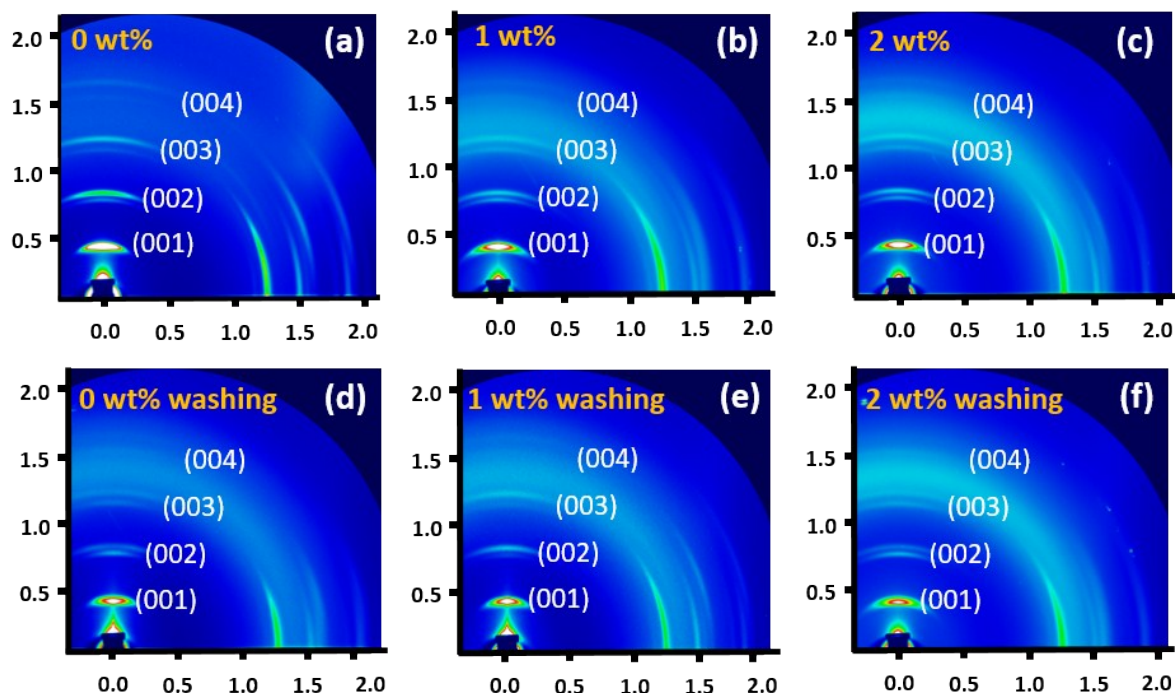

**Figure S1.** 2D-GIXD patterns of pentacene deposited on EHD jet printed PEDOT:PSS/additives/hardener electrodes with hardener amount of (a, d) 0 wt%, (b, e) 1 wt%, and (c, f) 2 wt% before (a, b, c) and after (d, e, f) washing. The intensities of the 2D-GIXD patterns were normalized according to the measured volume and X-ray exposure time.

All the 2D-GIXD patterns of pentacene films showed arc-shaped spots including (00l) and (00l)\* reflections along the out-of-plane and the in-plane directions, which corresponded to randomly-oriented crystals. In other words, pentacene semiconductor molecules formed polymorphic structures composed of thin-film and bulk phase crystals, regardless of the conditions of PEDOT:PSS/additives/hardener electrodes.

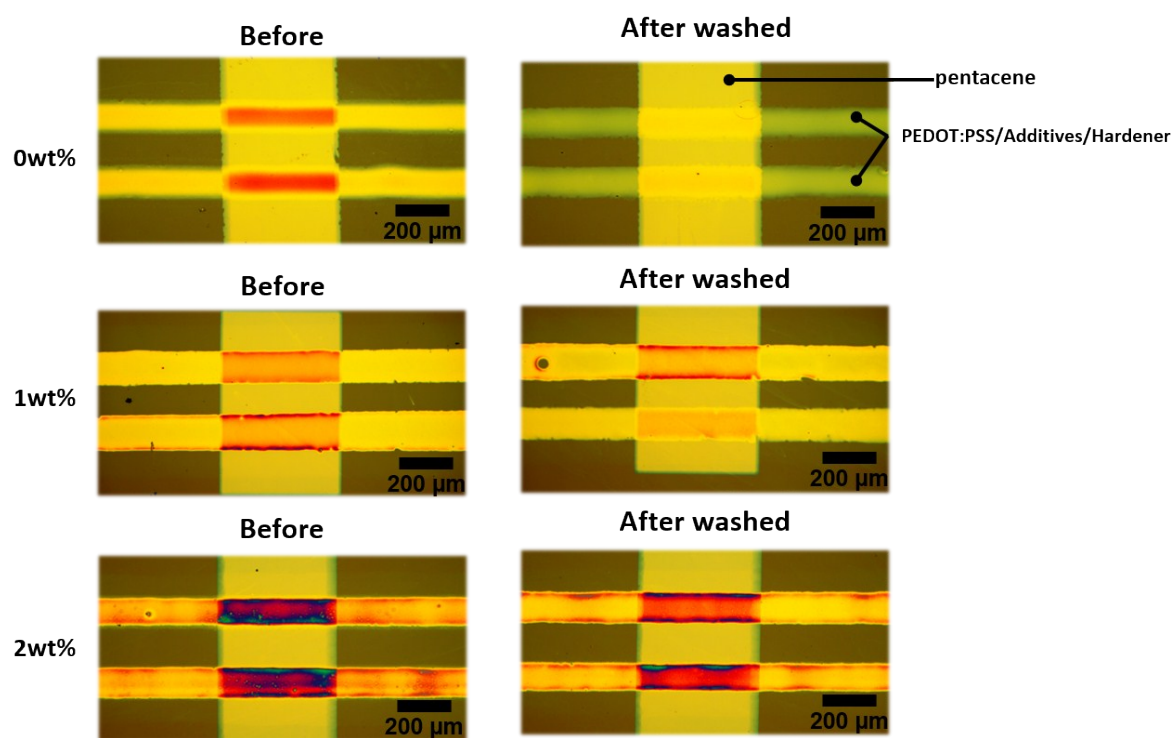

**Figure S2.** OM images of pentacene on EHD jet printed PEDOT:PSS/additives/hardener (hardener amount = 0 wt%, 1 wt%, and 2 wt%) electrodes before and after washing.
